# Supplementary material
Source: PubMed Central journal article supplement (PMC3072570)
Supplement: NIHMS267354-supplement-1.pdf [file NIHMS267354-supplement-1.pdf]

|         |                                                         |                                                 |        |    |    |    |     |    |    |    |    |    |     |
|---------|---------------------------------------------------------|-------------------------------------------------|--------|----|----|----|-----|----|----|----|----|----|-----|
| Col1a1  | collagen type 1 alpha 1                                 | IPI00844828                                     | 137936 | 0  | 0  | 0  | 0   | 0  | 0  | 0  | 0  | 13 | 17  |
| Col1a2  | Collagen alpha-2(I) chain                               | IPI00188921                                     | 129547 | 0  | 0  | 0  | 0   | 0  | 0  | 0  | 0  | 2  | 13  |
| Copa    | Copa protein                                            | IPI00372458                                     | 138346 | 1  | 0  | 1  | 1   | 0  | 2  | 0  | 0  | 4  | 21  |
| Copb1   | Coatomer subunit beta                                   | IPI00211812                                     | 106996 | 0  | 1  | 0  | 0   | 1  | 1  | 0  | 0  | 0  | 15  |
| Copb2   | Coatomer subunit beta'                                  | IPI00231953                                     | 102535 | 2  | 3  | 3  | 4   | 4  | 4  | 0  | 0  | 0  | 12  |
| Copg    | Coatomer subunit gamma                                  | IPI00780394                                     | 98515  | 1  | 1  | 0  | 2   | 1  | 1  | 0  | 0  | 1  | 10  |
| Coro2b  | similar to coronin actin binding protein 2B             | IPI00373332                                     | 54948  | 8  | 5  | 4  | 3   | 2  | 6  | 0  | 0  | 0  | 2   |
| Cttn    | Cortactin isoform C                                     | IPI00198498,IPI00198520,IPI00558156,IPI00777920 | 52664  | 0  | 2  | 0  | 0   | 0  | 2  | 0  | 0  | 0  | 1   |
| Dbn1    | Isoform A of Drebrin                                    | IPI00231407,IPI00231784                         | 77453  | 10 | 14 | 16 | 10  | 15 | 21 | 2  | 7  | 0  | 7   |
| DCD     | Dermcidin                                               | IPI00421832                                     | 11266  | 37 | 21 | 37 | 46  | 51 | 61 | 87 | 52 | 6  | 6   |
| Ddb1    | DNA damage-binding protein 1                            | IPI00324451                                     | 127044 | 0  | 0  | 0  | 0   | 0  | 0  | 0  | 0  | 0  | 3   |
| Ddx1    | ATP-dependent RNA helicase DDX1                         | IPI00555314                                     | 82480  | 0  | 0  | 2  | 0   | 0  | 2  | 0  | 0  | 0  | 1   |
| Ddx3x   | DEAD (Asp-Glu-Ala-Asp) box polypeptide 3 X-linked       | IPI00362534                                     | 73130  | 12 | 11 | 10 | 10  | 15 | 20 | 0  | 9  | 3  | 7   |
| Ddx5    | Ddx5                                                    | IPI00464718                                     | 69223  | 0  | 6  | 3  | 3   | 3  | 8  | 1  | 1  | 0  | 0   |
| Dnm2    | Isoform 1 of Dynamin-2                                  | IPI00210319,IPI00389749,IPI00389750,IPI00896218 | 98232  | 0  | 0  | 0  | 0   | 0  | 0  | 0  | 0  | 0  | 4   |
| Dpysl2  | Dihydropyrimidinase-related protein 2                   | IPI00870112                                     | 62260  | 0  | 1  | 0  | 0   | 0  | 0  | 0  | 0  | 0  | 2   |
| Dpysl3  | Isoform 2 of Dihydropyrimidinase-related protein 3      | IPI00203250                                     | 73882  | 0  | 0  | 1  | 1   | 0  | 0  | 0  | 0  | 1  | 6   |
| Dsp     | similar to desmoplakin isoform 1 isoform 2              | IPI00366081                                     | 332383 | 10 | 11 | 39 | 27  | 28 | 23 | 20 | 21 | 1  | 0   |
| Eef1a1  | Elongation factor 1-alpha 1                             | IPI00195372,IPI00551729                         | 50096  | 13 | 17 | 25 | 19  | 18 | 27 | 15 | 14 | 17 | 11  |
| Eef1d   | Eukaryotic translation elongation factor 1 delta        | IPI00197900,IPI00471525,IPI00557328             | 72252  | 0  | 0  | 0  | 0   | 0  | 0  | 0  | 0  | 1  | 2   |
| Eef2    | Elongation factor 2                                     | IPI00203214                                     | 95268  | 4  | 9  | 12 | 16  | 13 | 17 | 0  | 5  | 1  | 6   |
| Ehd2    | EH domain-containing protein 2                          | IPI00211448                                     | 61221  | 0  | 4  | 1  | 1   | 0  | 2  | 0  | 0  | 0  | 2   |
| Eif3c   | Eukaryotic translation initiation factor 3 subunit C    | IPI00914189                                     | 105420 | 0  | 0  | 0  | 0   | 0  | 0  | 0  | 0  | 0  | 6   |
| Emilin1 | elastin microfibril interfacer 1                        | IPI00199867                                     | 107542 | 0  | 0  | 0  | 0   | 0  | 0  | 0  | 0  | 0  | 11  |
| Eno1    | Alpha-enolase                                           | IPI00464815,IPI00767147                         | 47111  | 1  | 3  | 10 | 4   | 2  | 3  | 2  | 1  | 2  | 2   |
| Eprs    | 170 kDa protein                                         | IPI00421357,IPI00476855                         | 170072 | 0  | 0  | 0  | 0   | 0  | 0  | 0  | 0  | 1  | 9   |
| Fbln2   | similar to Fibulin-2 precursor isoform 1                | IPI00365178,IPI00388257                         | 126171 | 0  | 0  | 0  | 0   | 0  | 0  | 0  | 0  | 0  | 2   |
| Fdps    | Farnesyl pyrophosphate synthetase                       | IPI00325147                                     | 40813  | 0  | 0  | 0  | 0   | 0  | 0  | 0  | 0  | 5  | 10  |
| Fermt2  | RCG61183 isoform CRA_b                                  | IPI00362106                                     | 77861  | 0  | 0  | 0  | 0   | 0  | 0  | 0  | 0  | 0  | 2   |
| Flii    | Flightless 1 homolog                                    | IPI00211698                                     | 144843 | 8  | 12 | 9  | 11  | 10 | 17 | 0  | 0  | 0  | 7   |
| Flot1   | Isoform 1 of Flotillin-1                                | IPI00208784                                     | 47481  | 1  | 4  | 8  | 3   | 0  | 1  | 3  | 1  | 0  | 0   |
| Fn1     | Isoform 1 of Fibronectin                                | IPI00200757,IPI00231982,IPI00231983             | 272486 | 0  | 0  | 0  | 0   | 0  | 0  | 0  | 0  | 1  | 12  |
| Gars    | similar to glycyI-tRNA synthetase                       | IPI00364262,IPI00766072                         | 88083  | 0  | 0  | 0  | 0   | 0  | 0  | 0  | 0  | 0  | 2   |
| Gnai2   | Guanine nucleotide-binding protein G(i) alpha-2 subunit | IPI00231925                                     | 40482  | 0  | 0  | 0  | 0   | 0  | 0  | 0  | 0  | 1  | 4   |
| Gsn     | Isoform 2 of Gelsolin                                   | IPI00923716                                     | 80911  | 66 | 75 | 86 | 100 | 72 | 63 | 13 | 34 | 52 | 122 |
| Hadha   | Trifunctional enzyme subunit alpha mitochondrial        | IPI00212622                                     | 82649  | 3  | 4  | 9  | 3   | 0  | 6  | 0  | 4  | 7  | 10  |
| Hadhb   | Trifunctional enzyme subunit beta mitochondrial         | IPI00198467                                     | 51398  | 0  | 0  | 3  | 0   | 0  | 0  | 0  | 0  | 0  | 0   |
| Hip1    | huntingtin interacting protein 1                        | IPI00765689                                     | 114988 | 1  | 6  | 3  | 4   | 7  | 7  | 0  | 0  | 0  | 0   |

|          |                                                        |                                                                                                 |        |     |     |     |     |     |     |     |     |     |     |
|----------|--------------------------------------------------------|-------------------------------------------------------------------------------------------------|--------|-----|-----|-----|-----|-----|-----|-----|-----|-----|-----|
| Hist4h4  | Histone H4                                             | IPI00231340,IPI00364897,IPI00368659,IPI00559188,IPI00561052,IPI00561706,IPI00764726,IPI00778180 | 11464  | 0   | 3   | 3   | 3   | 4   | 0   | 0   | 6   | 0   | 2   |
| Hnrnpk   | Hnrpk protein                                          | IPI00194974,IPI00780608                                                                         | 51012  | 2   | 4   | 4   | 3   | 0   | 2   | 0   | 0   | 2   | 3   |
| Hnrnpu   | SP120                                                  | IPI00210090,IPI00566967                                                                         | 87731  | 1   | 1   | 2   | 1   | 2   | 2   | 0   | 1   | 1   | 7   |
| Hnrph1   | Isoform 1 of Heterogeneous nuclear ribonucleoprotein H | IPI00202027,IPI00203088,IPI00464512,IPI00851133,IPI00851145                                     | 49171  | 0   | 0   | 2   | 1   | 0   | 1   | 0   | 0   | 0   | 1   |
| Hnrpm    | heterogeneous nuclear ribonucleoprotein M isoform a    | IPI00876603                                                                                     | 77613  | 5   | 3   | 6   | 6   | 3   | 11  | 0   | 0   | 2   | 6   |
| Hsd17b4  | Hsd17b4 protein                                        | IPI00326948,IPI00561647                                                                         | 81072  | 0   | 5   | 2   | 1   | 3   | 4   | 1   | 3   | 0   | 0   |
| Hsp90aa1 | Heat shock protein HSP 90-alpha                        | IPI00210566                                                                                     | 84800  | 0   | 0   | 4   | 3   | 0   | 0   | 0   | 0   | 1   | 5   |
| Hsp90ab1 | Heat shock protein HSP 90-beta                         | IPI00471584                                                                                     | 83266  | 16  | 25  | 29  | 32  | 14  | 23  | 4   | 17  | 16  | 38  |
| Hspa5    | 78 kDa glucose-regulated protein                       | IPI00206624                                                                                     | 72331  | 34  | 52  | 36  | 42  | 41  | 59  | 12  | 33  | 25  | 32  |
| Hspa8    | Heat shock cognate 71 kDa protein                      | IPI00208205                                                                                     | 70855  | 37  | 56  | 49  | 45  | 59  | 59  | 8   | 27  | 17  | 24  |
| Hspa9    | Stress-70 protein mitochondrial                        | IPI00363265                                                                                     | 73840  | 9   | 17  | 14  | 11  | 19  | 23  | 3   | 6   | 5   | 9   |
| Hspd1    | 60 kDa heat shock protein mitochondrial                | IPI00339148                                                                                     | 60939  | 0   | 1   | 1   | 0   | 0   | 0   | 0   | 0   | 3   | 3   |
| Htra1    | HtrA serine peptidase 1 isoform CRA_a                  | IPI00199325                                                                                     | 51312  | 4   | 8   | 10  | 14  | 4   | 12  | 1   | 2   | 1   | 15  |
| Iars     | isoleucyl-tRNA synthetase                              | IPI00365783                                                                                     | 144271 | 0   | 0   | 0   | 0   | 0   | 0   | 0   | 0   | 1   | 2   |
| Immt     | 82 kDa protein                                         | IPI00364895,IPI00566985                                                                         | 82231  | 0   | 0   | 0   | 0   | 0   | 2   | 0   | 0   | 0   | 7   |
| Jup      | Junction plakoglobin                                   | IPI00421429                                                                                     | 81784  | 0   | 3   | 27  | 15  | 12  | 9   | 16  | 17  | 1   | 0   |
| Kab      | 174 kDa protein                                        | IPI00776774                                                                                     | 173996 | 3   | 4   | 6   | 5   | 8   | 3   | 12  | 1   | 0   | 0   |
| Kb15     | Type II keratin Kb15                                   | IPI00207038                                                                                     | 58080  | 85  | 83  | 107 | 130 | 114 | 100 | 203 | 174 | 27  | 27  |
| Kb23     | Type II keratin Kb23                                   | IPI00454476,IPI00780672                                                                         | 62207  | 0   | 3   | 49  | 39  | 3   | 1   | 0   | 16  | 0   | 0   |
| Kbtbd10  | Kelch repeat and BTB domain-containing protein 10      | IPI00190417                                                                                     | 68198  | 4   | 7   | 7   | 9   | 5   | 19  | 1   | 1   | 0   | 0   |
| Kbtbd5   | kelch repeat and BTB (POZ) domain containing 5         | IPI00371293                                                                                     | 67154  | 0   | 0   | 0   | 0   | 0   | 2   | 0   | 0   | 0   | 0   |
| Kif5b    | Kinesin-1 heavy chain                                  | IPI00364904                                                                                     | 109514 | 0   | 2   | 2   | 0   | 2   | 2   | 0   | 0   | 0   | 13  |
| Kpnb1    | Importin subunit beta-1                                | IPI00204261                                                                                     | 97167  | 0   | 0   | 0   | 1   | 0   | 0   | 0   | 0   | 0   | 9   |
| Krt1     | Keratin type II cytoskeletal 1                         | IPI00421857                                                                                     | 64814  | 220 | 264 | 386 | 239 | 278 | 315 | 298 | 264 | 135 | 130 |
| Krt10    | Keratin type I cytoskeletal 10                         | IPI00421806,IPI00551673                                                                         | 56489  | 283 | 244 | 362 | 342 | 338 | 314 | 430 | 365 | 97  | 131 |
| Krt13    | Keratin type I cytoskeletal 13                         | IPI00421795                                                                                     | 47713  | 4   | 4   | 9   | 13  | 1   | 3   | 2   | 4   | 0   | 0   |
| Krt14    | Keratin type I cytoskeletal 14                         | IPI00421855                                                                                     | 52667  | 128 | 90  | 171 | 142 | 150 | 131 | 130 | 106 | 28  | 28  |
| Krt15    | Keratin type I cytoskeletal 15                         | IPI00370090                                                                                     | 48854  | 7   | 9   | 8   | 9   | 2   | 1   | 2   | 4   | 7   | 5   |
| Krt16    | Type I keratin KA16                                    | IPI00421793                                                                                     | 50760  | 21  | 31  | 54  | 24  | 29  | 24  | 45  | 27  | 15  | 9   |
| Krt17    | Keratin type I cytoskeletal 17                         | IPI00370073                                                                                     | 48106  | 295 | 292 | 468 | 283 | 337 | 339 | 386 | 325 | 43  | 28  |
| Krt2     | Keratin type II cytoskeletal 2 epidermal               | IPI00551558,IPI00559533                                                                         | 69273  | 146 | 125 | 199 | 157 | 175 | 181 | 206 | 172 | 33  | 34  |
| Krt33a   | Type I hair keratin KA27                               | IPI00551773                                                                                     | 45954  | 0   | 4   | 46  | 37  | 1   | 4   | 0   | 9   | 0   | 0   |
| Krt35    | Type I hair keratin KA30                               | IPI00421797                                                                                     | 50657  | 0   | 0   | 7   | 10  | 0   | 1   | 0   | 2   | 0   | 0   |
| Krt42    | Keratin type I cytoskeletal 42                         | IPI00421791                                                                                     | 50196  | 18  | 18  | 19  | 22  | 21  | 20  | 19  | 19  | 4   | 4   |
| Krt5     | Keratin type II cytoskeletal 5                         | IPI00382153                                                                                     | 61809  | 474 | 456 | 674 | 596 | 602 | 628 | 711 | 634 | 110 | 107 |
| Krt73    | Keratin type II cytoskeletal 73                        | IPI00421780                                                                                     | 60370  | 1   | 2   | 2   | 7   | 2   | 1   | 2   | 2   | 0   | 0   |
| Krt75    | 58 kDa protein                                         | IPI00777617                                                                                     | 57763  | 1   | 4   | 3   | 5   | 3   | 0   | 3   | 2   | 1   | 0   |
| Krt76    | Type II keratin Kb9                                    | IPI00421812                                                                                     | 61742  | 2   | 1   | 0   | 3   | 3   | 1   | 4   | 6   | 0   | 0   |
| Krt77    | Keratin type II cytoskeletal 1b                        | IPI00454475                                                                                     | 57238  | 0   | 1   | 3   | 0   | 1   | 1   | 5   | 1   | 1   | 0   |
| Krt85    | Type II keratin Kb25                                   | IPI00200792,IPI00421785                                                                         | 55803  | 0   | 0   | 3   | 2   | 0   | 0   | 0   | 0   | 0   | 0   |

|                           |                                                                             |                                                                                                                                                                         |        |      |      |      |      |      |      |      |      |     |     |
|---------------------------|-----------------------------------------------------------------------------|-------------------------------------------------------------------------------------------------------------------------------------------------------------------------|--------|------|------|------|------|------|------|------|------|-----|-----|
| Ktn1                      | similar to kinectin 1                                                       | IPI00563574                                                                                                                                                             | 151567 | 0    | 0    | 0    | 0    | 0    | 0    | 0    | 0    | 0   | 3   |
| Lamp1                     | Lysosome-associated membrane glycoprotein 1                                 | IPI00206336                                                                                                                                                             | 43952  | 0    | 1    | 0    | 0    | 0    | 0    | 0    | 0    | 1   | 4   |
| Ldha                      | L-lactate dehydrogenase A chain                                             | IPI00197711                                                                                                                                                             | 36433  | 0    | 0    | 0    | 0    | 0    | 0    | 0    | 0    | 4   | 5   |
| Lima1                     | similar to Epithelial protein lost in neoplasm                              | IPI00373011                                                                                                                                                             | 83779  | 6    | 5    | 5    | 3    | 0    | 11   | 0    | 0    | 0   | 4   |
| Lmna                      | Lamin-A                                                                     | IPI00201060                                                                                                                                                             | 74307  | 0    | 1    | 0    | 2    | 0    | 0    | 0    | 0    | 3   | 3   |
| Lmo7                      | LMO7b                                                                       | IPI00421345                                                                                                                                                             | 156634 | 112  | 120  | 123  | 141  | 116  | 181  | 42   | 95   | 14  | 78  |
| Lmod2                     | Leiomodin-2                                                                 | IPI00372026                                                                                                                                                             | 61700  | 9    | 6    | 3    | 13   | 11   | 11   | 0    | 4    | 0   | 3   |
| Lmod3                     | similar to leiomodin 3                                                      | IPI00568699                                                                                                                                                             | 57499  | 16   | 14   | 14   | 14   | 8    | 18   | 1    | 7    | 0   | 1   |
| LOC680312                 | histone H2B                                                                 | IPI00190348,IPI00209163,IPI00388454,IPI00393508,IPI00480852,IPI00551802,IPI00556932,IPI00560461,IPI00560818,IPI00734783,IPI00764164,IPI00766320,IPI00768311,IPI00870721 | 13873  | 0    | 0    | 0    | 0    | 4    | 0    | 0    | 2    | 0   | 1   |
| LOC682005;Gapdh;LOC685186 | Glyceraldehyde-3-phosphate dehydrogenase                                    | IPI00555252,IPI00567177                                                                                                                                                 | 35810  | 1    | 0    | 1    | 5    | 1    | 16   | 0    | 1    | 33  | 51  |
| LOC682649                 | similar to Histone H2A type 1                                               | IPI00559107                                                                                                                                                             | 18545  | 1    | 2    | 4    | 7    | 5    | 2    | 2    | 4    | 0   | 0   |
| LOC683313                 | Keratin type II cytoskeletal 6A                                             | IPI00393340                                                                                                                                                             | 59233  | 52   | 55   | 78   | 63   | 74   | 52   | 82   | 71   | 38  | 44  |
| LOC683613                 | similar to Keratin type II cytoskeletal 6G                                  | IPI00768956                                                                                                                                                             | 57419  | 4    | 5    | 12   | 8    | 10   | 12   | 26   | 19   | 1   | 1   |
| LOC687295                 | similar to translocase of inner mitochondrial membrane 50 homolog isoform 2 | IPI00766169                                                                                                                                                             | 39838  | 0    | 0    | 0    | 0    | 0    | 0    | 0    | 0    | 0   | 3   |
| Lrrfp2                    | Leucine-rich repeat flightless-interacting protein 2                        | IPI00373564,IPI00780550                                                                                                                                                 | 49756  | 6    | 7    | 3    | 6    | 5    | 12   | 0    | 7    | 0   | 0   |
| Luzp1                     | leucine zipper protein 1                                                    | IPI00324444                                                                                                                                                             | 119795 | 0    | 1    | 0    | 0    | 0    | 0    | 0    | 0    | 0   | 3   |
| Mars                      | methionine-tRNA synthetase                                                  | IPI00366397                                                                                                                                                             | 101566 | 0    | 0    | 0    | 0    | 0    | 0    | 0    | 0    | 0   | 2   |
| Mprip                     | 258 kDa protein                                                             | IPI00392930                                                                                                                                                             | 257845 | 71   | 95   | 100  | 105  | 73   | 117  | 11   | 58   | 11  | 83  |
| Mrlc2                     | Myosin regulatory light chain MRLC2                                         | IPI00421625,IPI00564409,IPI00914162                                                                                                                                     | 19821  | 0    | 0    | 0    | 0    | 0    | 0    | 0    | 0    | 5   | 1   |
| Msi2                      | similar to Musashi homolog 2                                                | IPI00372674,IPI00765904                                                                                                                                                 | 34694  | 0    | 0    | 0    | 0    | 0    | 0    | 0    | 0    | 1   | 2   |
| Mtdh                      | Isoform 1 of Protein LYRIC                                                  | IPI00209277,IPI00515783,IPI00515808,IPI00515819                                                                                                                         | 63953  | 1    | 0    | 1    | 0    | 0    | 1    | 0    | 0    | 1   | 2   |
| Mvp                       | Major vault protein                                                         | IPI00231381                                                                                                                                                             | 96806  | 0    | 3    | 0    | 0    | 0    | 0    | 0    | 0    | 0   | 3   |
| Mybph                     | 53 kDa protein                                                              | IPI00557294                                                                                                                                                             | 52762  | 0    | 2    | 5    | 3    | 0    | 3    | 0    | 0    | 0   | 0   |
| Myh10                     | 234 kDa protein                                                             | IPI00391300                                                                                                                                                             | 233603 | 210  | 116  | 150  | 363  | 166  | 157  | 143  | 435  | 10  | 145 |
| Myh11                     | similar to Myosin-11                                                        | IPI00558912                                                                                                                                                             | 226689 | 0    | 0    | 0    | 0    | 0    | 0    | 2    | 1    | 3   | 1   |
| Myh14                     | myosin heavy chain 14                                                       | IPI00367479                                                                                                                                                             | 229088 | 13   | 5    | 9    | 19   | 9    | 15   | 12   | 23   | 0   | 3   |
| Myh3                      | Myosin-3                                                                    | IPI00201578                                                                                                                                                             | 223846 | 146  | 132  | 172  | 323  | 149  | 217  | 182  | 306  | 14  | 99  |
| Myh9                      | Myosin-9                                                                    | IPI00209113                                                                                                                                                             | 226326 | 2139 | 1242 | 1862 | 3095 | 2027 | 2067 | 2414 | 3511 | 358 | 883 |
| MyI6I                     | Myosin light polypeptide 6                                                  | IPI00365944,IPI00392935,IPI00817070,IPI00896236                                                                                                                         | 16957  | 1    | 0    | 0    | 1    | 0    | 1    | 0    | 7    | 4   | 0   |
| Myo1b                     | Isoform C of Myosin-Ib                                                      | IPI00231045,IPI00331979,IPI00391496                                                                                                                                     | 124908 | 1    | 3    | 0    | 5    | 3    | 8    | 0    | 0    | 0   | 0   |
| Myo1c                     | Myosin-1c                                                                   | IPI00393867                                                                                                                                                             | 119797 | 216  | 215  | 252  | 289  | 328  | 381  | 73   | 175  | 15  | 110 |
| Myo1d                     | Myosin-1d                                                                   | IPI00207989                                                                                                                                                             | 116081 | 149  | 144  | 166  | 221  | 255  | 272  | 48   | 135  | 0   | 28  |
| Myo1e                     | Myosin-1e                                                                   | IPI00207988,IPI00388110                                                                                                                                                 | 126813 | 0    | 0    | 1    | 1    | 2    | 2    | 0    | 0    | 0   | 1   |
| Ncl                       | Nucleolin                                                                   | IPI00231827,IPI00882501                                                                                                                                                 | 77259  | 2    | 2    | 2    | 4    | 7    | 7    | 0    | 1    | 0   | 10  |
| Ndufs1                    | NADH-ubiquinone oxidoreductase 75 kDa subunit mitochondrial                 | IPI00358033                                                                                                                                                             | 79396  | 0    | 0    | 0    | 0    | 0    | 0    | 0    | 0    | 0   | 2   |
| Nedd4                     | neural precursor cell expressed developmentally down-regulated gene 4       | IPI00876592                                                                                                                                                             | 102739 | 0    | 0    | 0    | 0    | 0    | 0    | 0    | 0    | 0   | 12  |
| Nes                       | Isoform 1 of Nestin                                                         | IPI00194103                                                                                                                                                             | 208776 | 0    | 0    | 0    | 0    | 0    | 0    | 0    | 0    | 0   | 27  |
| Nexn                      | Isoform 1 of Nexilin                                                        | IPI00209938                                                                                                                                                             | 78377  | 49   | 50   | 50   | 47   | 63   | 61   | 5    | 31   | 1   | 13  |
| Nnt                       | 76 kDa protein                                                              | IPI00390435,IPI00555265                                                                                                                                                 | 75804  | 0    | 1    | 0    | 0    | 0    | 0    | 0    | 1    | 0   | 2   |



|            |                                                                          |                                                                                                 |        |     |     |     |     |     |     |     |     |     |     |
|------------|--------------------------------------------------------------------------|-------------------------------------------------------------------------------------------------|--------|-----|-----|-----|-----|-----|-----|-----|-----|-----|-----|
| Rai14      | Isoform 2 of Ankyrbin                                                    | IPI00372146                                                                                     | 105981 | 44  | 51  | 60  | 61  | 50  | 69  | 0   | 32  | 12  | 62  |
| RGD1563532 | 86 kDa protein                                                           | IPI00568788,IPI00768137                                                                         | 85638  | 0   | 0   | 0   | 0   | 0   | 1   | 0   | 0   | 0   | 5   |
| Rpn1       | Ribophorin1                                                              | IPI00204365                                                                                     | 68384  | 0   | 0   | 1   | 0   | 0   | 1   | 0   | 0   | 2   | 5   |
| Rpn2       | Dolichyl-diphosphooligosaccharide--protein glycosyltransferase subunit 2 | IPI00188059                                                                                     | 69060  | 0   | 2   | 1   | 0   | 0   | 0   | 0   | 0   | 4   | 4   |
| Rps27a     | Ribosomal protein S27a similar to Ribosome-binding protein 1             | IPI00190240,IPI00198550,IPI00361888,IPI00391830,IPI00476033,IPI00656453,IPI00776427,IPI00882520 | 17934  | 14  | 15  | 22  | 21  | 21  | 24  | 18  | 15  | 7   | 9   |
| Rrbp1      | Scinderin                                                                | IPI00188079                                                                                     | 143655 | 0   | 0   | 0   | 0   | 0   | 0   | 0   | 0   | 3   | 15  |
| Scin       | Serum deprivation-response protein                                       | IPI00365568,IPI00391226                                                                         | 80184  | 3   | 3   | 3   | 6   | 3   | 8   | 0   | 2   | 0   | 0   |
| Sdpr       | Isoform 1 of Protein transport protein Sec31A                            | IPI00362416                                                                                     | 46368  | 0   | 5   | 12  | 8   | 2   | 18  | 3   | 4   | 0   | 0   |
| Sec31a     | septin 9 isoform 1                                                       | IPI00210147,IPI00515833                                                                         | 135256 | 0   | 0   | 0   | 0   | 0   | 0   | 0   | 0   | 0   | 4   |
| SEPT9      | Serpin H1                                                                | IPI00215235,IPI00782707                                                                         | 64850  | 0   | 0   | 3   | 3   | 1   | 6   | 1   | 0   | 0   | 0   |
| Serpinh1   | Splicing factor proline/glutamine rich                                   | IPI00204703                                                                                     | 46501  | 0   | 0   | 1   | 2   | 0   | 1   | 0   | 0   | 4   | 4   |
| Sfpq       | smoothelin                                                               | IPI00627068                                                                                     | 75469  | 0   | 2   | 0   | 1   | 0   | 3   | 0   | 1   | 0   | 2   |
| Smtn       | Cytospin-A                                                               | IPI00361871,IPI00561311                                                                         | 99862  | 12  | 8   | 15  | 13  | 13  | 13  | 0   | 7   | 0   | 13  |
| Specc1l    | similar to Signal recognition particle 72 kDa protein                    | IPI00372846                                                                                     | 124324 | 16  | 20  | 21  | 18  | 15  | 36  | 2   | 19  | 0   | 3   |
| Srp72      | Ab2-131                                                                  | IPI00763992,IPI00766213,IPI00766719                                                             | 73844  | 0   | 0   | 0   | 0   | 0   | 0   | 0   | 0   | 0   | 3   |
| Stat1      | 70 kDa protein                                                           | IPI00213245,IPI00382229,IPI00655247                                                             | 134593 | 0   | 0   | 0   | 0   | 0   | 0   | 0   | 0   | 0   | 4   |
| Syncrip    | T-complex protein 1 subunit alpha                                        | IPI00557424,IPI00764064,IPI00776515,IPI00782066                                                 | 69603  | 0   | 3   | 2   | 1   | 0   | 3   | 0   | 0   | 1   | 3   |
| Tcp1       | Thrombospondin 1                                                         | IPI00200847                                                                                     | 60343  | 0   | 1   | 2   | 0   | 0   | 0   | 0   | 0   | 0   | 1   |
| Thbs1      | Tropomodulin-1                                                           | IPI00422076                                                                                     | 129653 | 0   | 0   | 0   | 0   | 0   | 0   | 0   | 0   | 13  | 38  |
| Tmod1      | Tropomodulin 3                                                           | IPI00189723,IPI00421889                                                                         | 40464  | 2   | 1   | 4   | 3   | 3   | 2   | 1   | 8   | 1   | 5   |
| Tmod3      | 75 kDa protein                                                           | IPI00373505                                                                                     | 39455  | 2   | 2   | 3   | 1   | 4   | 8   | 1   | 2   | 9   | 18  |
| Tmpo       | Isoform 2 of Troponin T cardiac muscle                                   | IPI00569391                                                                                     | 74885  | 1   | 1   | 2   | 1   | 0   | 6   | 0   | 0   | 0   | 3   |
| Tnnt2      | Isoform 1 of Troponin T fast skeletal muscle                             | IPI00231332,IPI00231812,IPI00561761,IPI00776952,IPI00780763                                     | 34435  | 87  | 45  | 111 | 103 | 111 | 112 | 45  | 76  | 2   | 8   |
| Tnnt3      | Isoform 1 of Tropomyosin alpha-1 chain                                   | IPI00554262,IPI00560341,IPI00829459,IPI00829466,IPI00829504,IPI00829511                         | 30734  | 18  | 22  | 25  | 28  | 38  | 46  | 0   | 21  | 2   | 6   |
| Tpm1       | tropomyosin 1 alpha isoform c                                            | IPI00197888                                                                                     | 32664  | 27  | 9   | 26  | 37  | 35  | 30  | 9   | 17  | 4   | 10  |
| Tpm1       | Isoform 1 of Tropomyosin beta chain                                      | IPI00210945                                                                                     | 32831  | 231 | 149 | 307 | 307 | 309 | 252 | 106 | 160 | 79  | 228 |
| Tpm2       | Isoform 2 of Tropomyosin beta chain                                      | IPI00230775                                                                                     | 32820  | 122 | 93  | 167 | 174 | 165 | 167 | 57  | 98  | 14  | 57  |
| Tpm2       | Isoform 1 of Endoplasmin                                                 | IPI00187731                                                                                     | 32941  | 12  | 8   | 8   | 12  | 14  | 13  | 3   | 11  | 3   | 21  |
| Tra1       | Tubulin alpha-1B chain                                                   | IPI00365985                                                                                     | 92756  | 1   | 3   | 5   | 3   | 3   | 3   | 0   | 0   | 7   | 9   |
| Tuba1b     | Tubulin beta-2A chain                                                    | IPI00339167                                                                                     | 50134  | 32  | 40  | 42  | 41  | 30  | 47  | 19  | 30  | 38  | 69  |
| Tubb2a     | Isoform 1 of Tubulin beta-5 chain                                        | IPI00475639                                                                                     | 49889  | 4   | 8   | 7   | 6   | 2   | 7   | 2   | 7   | 2   | 4   |
| Tubb5      | Tubulin beta 6                                                           | IPI00197579                                                                                     | 49653  | 23  | 49  | 66  | 63  | 39  | 69  | 20  | 32  | 25  | 45  |
| Tubb6      | General vesicular transport factor p115                                  | IPI00195673                                                                                     | 50041  | 4   | 12  | 16  | 12  | 3   | 14  | 6   | 10  | 4   | 11  |
| Uso1       | Vinculin                                                                 | IPI00324618                                                                                     | 107147 | 0   | 0   | 0   | 0   | 0   | 0   | 0   | 0   | 0   | 3   |
| Vcl        | Transitional endoplasmic reticulum ATPase                                | IPI00365286                                                                                     | 116599 | 0   | 1   | 25  | 7   | 1   | 5   | 0   | 0   | 1   | 5   |
| Vcp        | Vimentin                                                                 | IPI00212014,IPI00778228                                                                         | 89519  | 0   | 0   | 2   | 0   | 0   | 1   | 0   | 0   | 0   | 0   |
| Vim        | maternal embryonic message 3                                             | IPI00230941                                                                                     | 53716  | 105 | 124 | 107 | 102 | 43  | 155 | 64  | 43  | 137 | 261 |
| Vps35      |                                                                          | IPI00869568                                                                                     | 91712  | 0   | 0   | 1   | 0   | 0   | 0   | 0   | 0   | 1   | 3   |
